# Supplementary material
Source: publisher site journal article supplement (https://www.dovepress.com/article/575518)
Supplement: Supplementary file 1 [file 575518%20Supplementary%20Material.pdf]

**Supplementary Material for A Diagnostic Accuracy Study of Combined  
OMP22-PCR and SAT for Brucellosis in Xinjiang, China**

This document contains: Supplementary Figs S1-S3, Supplementary Tables S1-S7, and  
Supplementary Datasets S1.

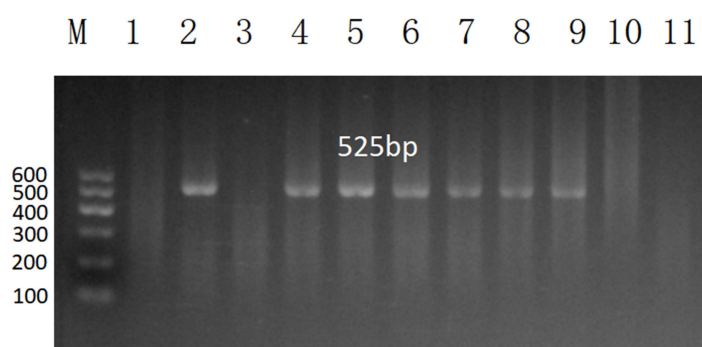

**Supplementary Fig. S1.** Representative electrophoretogram of OMP22-PCR detection in partial blood samples.

M: DNA Marker; 1: Negative control (ddH<sub>2</sub>O); 2: Positive control (Brucella 16M); 3: Negative control (E. coli); 4-9: OMP22-PCR positive serum samples; 10-11: OMP22-PCR negative serum samples.

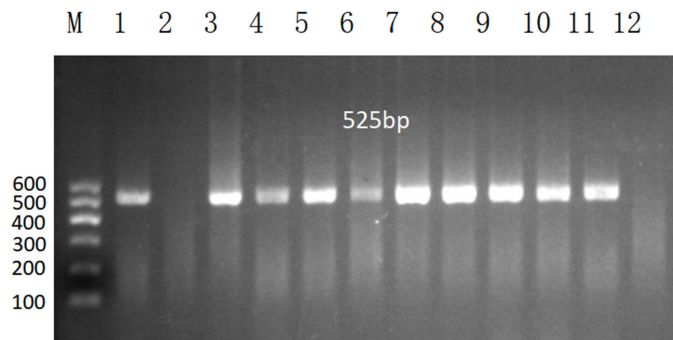

**Supplementary Fig. S2.** Electrophoretogram of OMP22-PCR detection in clinical isolates.

M: DNA Marker; 1: Positive control (Brucella 16M); 2: Negative control (ddH<sub>2</sub>O);

3-11: Genomic DNA from clinical isolates (samples 1-9); 12: E. coli control.

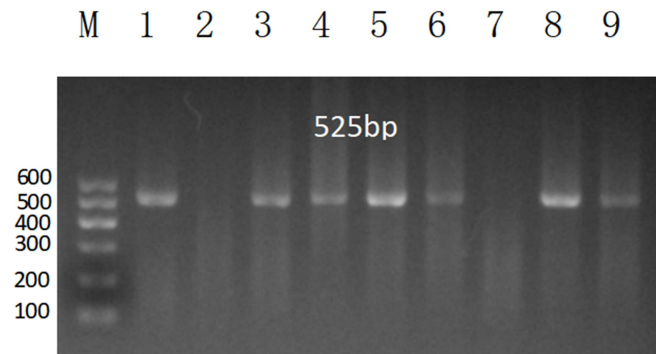

**Supplementary Fig. S3.** Representative electrophoretogram of OMP22-PCR

detection in urine and CSF samples.

M: DNA Marker; 1: Positive control (Brucella 16M); 2: Negative control (ddH<sub>2</sub>O);

3-6: OMP22-PCR positive urine samples; 7: OMP22-PCR negative urine sample; 8-9:

OMP22-PCR positive CSF samples.

### Supplementary Table S1.

Diagnostic Performance of the Standard Tube Agglutination Test (SAT) in Serum  
Samples Compared to Blood Culture (Reference Standard)

|              | Blood Culture Positive | Blood Culture Negative | Total |
|--------------|------------------------|------------------------|-------|
| SAT Positive | 60(True Positive)      | 3 (False Positive)     | 63    |
| SAT Negative | 2(False Negative)      | 22(True Negative)      | 24    |
| Total        | 62                     | 25                     | 87    |

Note: Based on this 2x2 contingency table, the diagnostic performance of SAT was calculated as follows: Sensitivity =  $60/62 = 96.8\%$ ; Specificity =  $22/25 = 88.0\%$ ; Positive Predictive Value (PPV) =  $60/63 = 95.2\%$ ; Negative Predictive Value (NPV) =  $22/24 = 91.7\%$ .

### Supplementary Table S2.

Distribution of Standard Tube Agglutination Test (SAT) Titers in Patients with  
Brucellosis (Case Group) and Control Subjects

| SAT Titer        | Case Group (n=62) | Control Group (n=25) |
|------------------|-------------------|----------------------|
| Negative         | 2 (3.2%)          | 22 (88.0%)           |
| 1:100            | 23 (37.1%)        | 3 (12.0%)            |
| 1:200            | 28 (45.2%)        | 0 (0.0%)             |
| 1:400            | 9 (14.5%)         | 0 (0.0%)             |
| Overall Positive | 60 (96.8%)        | 3 (12.0%)            |

**Supplementary Table S3.**

Diagnostic Performance of OMP22-PCR in Serum Samples Compared to Blood  
Culture (Reference Standard)

|                        | Blood Culture Positive | Blood Culture Negative | Total |
|------------------------|------------------------|------------------------|-------|
| OMP22-PCR Positive     | 58 (True Positive)     | 2 (False Positive)     | 60    |
| OMP22-PCR Negative     | 4 (False Negative)     | 23 (True Negative)     | 27    |
| Total                  | 62                     | 25                     | 87    |
| Positive Rate by Group | 58/62 (93.5%)          | 2/25 (8.0%)            |       |

Note: Based on this 2x2 contingency table, the diagnostic performance of OMP22-PCR was calculated as follows: Sensitivity =  $58/62 = 93.5\%$ ; Specificity =  $23/25 = 92.0\%$ ; Positive Predictive Value (PPV) =  $58/60 = 96.7\%$ ; Negative Predictive Value (NPV) =  $23/27 = 85.2\%$ . The group-specific positive rates are provided for additional context.

**Supplementary Table S4.**

Consistency analysis of OMP22-PCR and SAT detection results

|                    | SAT Positive | SAT Negative | Total |
|--------------------|--------------|--------------|-------|
| OMP22-PCR Positive | 56           | 4            | 60    |
| OMP22-PCR Negative | 7            | 20           | 27    |
| Total              | 63           | 24           | 87    |
| Kappa value        | 0.70         |              |       |

**Supplementary Table S5.**

Comparison of Diagnostic Efficacy Indicators for OMP22-PCR, Standard Tube Agglutination Test (SAT), and Their Combined Detection Strategy

| Indicator                   | OMP22-PCR           | SAT                 | Combination         |
|-----------------------------|---------------------|---------------------|---------------------|
| Sensitivity/%               | 93.5                | 96.8                | 96.8                |
| Specificity/%               | 92.0                | 88.0                | 100.0               |
| Positive Predictive Value/% | 96.7                | 95.2                | 100.0               |
| Negative Predictive Value/% | 85.2                | 91.7                | 92.6                |
| Accuracy/%                  | 93.1                | 94.3                | 97.7                |
| AUC (95% CI)                | 0.928 (0.856-0.999) | 0.921 (0.841-1.000) | 0.981 (0.952-1.000) |

**Supplementary Table S6.**

OMP22-PCR Detection Rates Across Different Clinical Sample Types from Patients with Confirmed Brucellosis

| OMP22-PCR       | Blood(n=62) | Urine(n=20) | CSF(n=2) |
|-----------------|-------------|-------------|----------|
| Positive        | 58          | 14          | 2        |
| Negative        | 4           | 6           | 0        |
| Positivity Rate | 93.5%       | 70%         | 100%     |

Note: The differential positivity rates across sample types likely reflect variations in bacterial load and distribution in body fluids. The 100% detection rate in

CSF, while promising, is based on a very small sample size and requires further validation.

**Supplementary Table S7.**

Integrated test results for the 62 brucellosis patients.

| Patient -ID | Group | Clinical _Stage | SAT Titer | OMP22-PCR Result | Urine_OMP22 _PCR | CSF_OMP22_PCR | Clinical_Isolat e_OMP22_PCR |
|-------------|-------|-----------------|-----------|------------------|------------------|---------------|-----------------------------|
| P01         | Case  | Acute           | 1:100     | Positive         | Positive         | N/A           | N/A                         |
| P02         | Case  | Acute           | 1:200     | Positive         | N/A              | N/A           | N/A                         |
| P03         | Case  | Chronic         | 1:100     | Negative         | N/A              | N/A           | N/A                         |
| P04         | Case  | Acute           | 1:200     | Positive         | N/A              | N/A           | N/A                         |
| P05         | Case  | Chronic         | 1:100     | Negative         | N/A              | N/A           | N/A                         |
| P06         | Case  | Acute           | 1:400     | Positive         | N/A              | Positive      | N/A                         |
| P07         | Case  | Acute           | 1:100     | Positive         | N/A              | N/A           | N/A                         |
| P08         | Case  | Subacute        | 1:400     | Positive         | N/A              | N/A           | N/A                         |
| P09         | Case  | Subacute        | 1:200     | Positive         | N/A              | N/A           | N/A                         |
| P10         | Case  | Acute           | 1:100     | Positive         | N/A              | N/A           | N/A                         |
| P11         | Case  | Acute           | 1:200     | Positive         | N/A              | N/A           | N/A                         |
| P12         | Case  | Subacute        | 1:100     | Positive         | N/A              | N/A           | N/A                         |
| P13         | Case  | Acute           | 1:200     | Positive         | N/A              | N/A           | N/A                         |
| P14         | Case  | Acute           | 1:200     | Positive         | N/A              | N/A           | N/A                         |
| P15         | Case  | Subacute        | 1:200     | Positive         | N/A              | N/A           | N/A                         |
| P16         | Case  | Acute           | 1:200     | Positive         | N/A              | N/A           | N/A                         |
| P17         | Case  | Acute           | 1:100     | Positive         | N/A              | N/A           | N/A                         |
| P18         | Case  | Subacute        | 1:100     | Positive         | N/A              | N/A           | N/A                         |
| P19         | Case  | Acute           | 1:100     | Positive         | N/A              | N/A           | N/A                         |
| P20         | Case  | Acute           | <1:100    | Positive         | Positive         | N/A           | Positive                    |
| P21         | Case  | Acute           | 1:100     | Positive         | Negative         | N/A           | Positive                    |
| P22         | Case  | Acute           | 1:400     | Positive         | Positive         | N/A           | Positive                    |
| P23         | Case  | Chronic         | 1:100     | Positive         | Negative         | N/A           | Positive                    |
| P24         | Case  | Acute           | 1:200     | Positive         | Positive         | N/A           | Positive                    |
| P25         | Case  | Subacute        | 1:100     | Positive         | Positive         | N/A           | Positive                    |
| P26         | Case  | Subacute        | 1:100     | Positive         | Positive         | N/A           | Positive                    |
| P27         | Case  | Acute           | 1:200     | Positive         | Positive         | N/A           | Positive                    |
| P28         | Case  | Acute           | 1:100     | Positive         | Positive         | N/A           | Positive                    |
| P29         | Case  | Acute           | 1:200     | Positive         | Positive         | N/A           | Positive                    |
| P30         | Case  | Acute           | 1:100     | Positive         | Positive         | N/A           | Positive                    |
| P31         | Case  | Chronic         | 1:200     | Positive         | Negative         | N/A           | Positive                    |
| P32         | Case  | Acute           | 1:100     | Positive         | Positive         | N/A           | Positive                    |
| P33         | Case  | Subacute        | 1:200     | Positive         | Positive         | N/A           | Positive                    |

|     |      |          |        |          |          |          |          |
|-----|------|----------|--------|----------|----------|----------|----------|
| P34 | Case | Acute    | 1:200  | Positive | Negative | N/A      | Positive |
| P35 | Case | Subacute | 1:200  | Positive | Negative | N/A      | Positive |
| P36 | Case | Subacute | 1:400  | Positive | Positive | N/A      | Positive |
| P37 | Case | Acute    | 1:100  | Positive | Negative | N/A      | Positive |
| P38 | Case | Acute    | 1:100  | Positive | N/A      | N/A      | Positive |
| P39 | Case | Acute    | 1:100  | Positive | N/A      | N/A      | Positive |
| P40 | Case | Acute    | 1:200  | Positive | N/A      | N/A      | N/A      |
| P41 | Case | Acute    | 1:200  | Positive | Positive | N/A      | N/A      |
| P42 | Case | Chronic  | 1:200  | Positive | N/A      | N/A      | N/A      |
| P43 | Case | Acute    | 1:200  | Positive | N/A      | N/A      | N/A      |
| P44 | Case | Acute    | 1:100  | Positive | N/A      | N/A      | N/A      |
| P45 | Case | Acute    | 1:200  | Positive | N/A      | N/A      | N/A      |
| P46 | Case | Subacute | 1:200  | Positive | N/A      | N/A      | N/A      |
| P47 | Case | Acute    | 1:100  | Positive | N/A      | N/A      | N/A      |
| P48 | Case | Subacute | 1:100  | Positive | N/A      | N/A      | N/A      |
| P49 | Case | Acute    | 1:200  | Positive | N/A      | N/A      | N/A      |
| P50 | Case | Subacute | 1:200  | Positive | N/A      | N/A      | N/A      |
| P51 | Case | Acute    | 1:200  | Positive | N/A      | N/A      | N/A      |
| P52 | Case | Acute    | 1:200  | Positive | N/A      | N/A      | N/A      |
| P53 | Case | Chronic  | 1:100  | Negative | N/A      | N/A      | N/A      |
| P54 | Case | Acute    | 1:200  | Positive | N/A      | N/A      | N/A      |
| P55 | Case | Subacute | 1:400  | Negative | N/A      | Positive | N/A      |
| P56 | Case | Subacute | 1:200  | Positive | N/A      | N/A      | N/A      |
| P57 | Case | Chronic  | 1:200  | Positive | N/A      | N/A      | N/A      |
| P58 | Case | Subacute | 1:400  | Positive | N/A      | N/A      | N/A      |
| P59 | Case | Chronic  | 1:400  | Positive | N/A      | N/A      | N/A      |
| P60 | Case | Acute    | <1:100 | Positive | N/A      | N/A      | N/A      |
| P61 | Case | Acute    | <1:100 | Positive | N/A      | N/A      | N/A      |
| P62 | Case | Acute    | 1:400  | Positive | N/A      | N/A      | N/A      |

Note: N/A, not applicable (sample not collected/tested).

### Supplementary Datasets S1.

Clinical data of the brucellosis patients and healthy controls.

| Patient-ID | Group | Age | Sex    | Sample_Type  | Fever | Sweating | Arthralgia |
|------------|-------|-----|--------|--------------|-------|----------|------------|
| P01        | Case  | 18  | Male   | Serum, Urine | Y     | N        | N          |
| P02        | Case  | 54  | Female | Serum        | Y     | Y        | Y          |
| P03        | Case  | 56  | Male   | Serum        | Y     | Y        | Y          |
| P04        | Case  | 30  | Female | Serum        | Y     | Y        | Y          |
| P05        | Case  | 76  | Male   | Serum        | Y     | N        | N          |
| P06        | Case  | 68  | Female | Serum, CSF   | Y     | N        | N          |

|     |      |    |        |              |   |   |   |
|-----|------|----|--------|--------------|---|---|---|
| P07 | Case | 52 | Male   | Serum        | N | N | N |
| P08 | Case | 70 | Male   | Serum        | N | Y | Y |
| P09 | Case | 52 | Female | Serum        | Y | Y | Y |
| P10 | Case | 45 | Male   | Serum        | N | N | N |
| P11 | Case | 61 | Female | Serum        | Y | Y | Y |
| P12 | Case | 58 | Male   | Serum        | Y | Y | Y |
| P13 | Case | 54 | Male   | Serum        | Y | Y | Y |
| P14 | Case | 48 | Male   | Serum        | Y | Y | Y |
| P15 | Case | 66 | Male   | Serum        | Y | Y | Y |
| P16 | Case | 41 | Male   | Serum        | Y | Y | Y |
| P17 | Case | 8  | Male   | Serum        | Y | N | N |
| P18 | Case | 63 | Male   | Serum        | Y | Y | N |
| P19 | Case | 43 | Male   | Serum        | Y | Y | N |
| P20 | Case | 50 | Male   | Serum, Urine | N | Y | Y |
| P21 | Case | 49 | Male   | Serum, Urine | Y | Y | Y |
| P22 | Case | 40 | Male   | Serum, Urine | Y | N | N |
| P23 | Case | 59 | Male   | Serum, Urine | Y | Y | Y |
| P24 | Case | 44 | Male   | Serum, Urine | Y | Y | Y |
| P25 | Case | 67 | Male   | Serum, Urine | N | N | N |
| P26 | Case | 47 | Male   | Serum, Urine | Y | Y | Y |
| P27 | Case | 17 | Male   | Serum, Urine | Y | Y | Y |
| P28 | Case | 42 | Male   | Serum, Urine | Y | N | Y |
| P29 | Case | 51 | Male   | Serum, Urine | Y | Y | N |
| P30 | Case | 46 | Female | Serum, Urine | Y | Y | N |
| P31 | Case | 70 | Male   | Serum, Urine | Y | N | N |
| P32 | Case | 50 | Female | Serum, Urine | Y | N | N |
| P33 | Case | 63 | Male   | Serum, Urine | Y | N | Y |
| P34 | Case | 60 | Male   | Serum, Urine | Y | N | Y |
| P35 | Case | 54 | Female | Serum, Urine | Y | N | N |
| P36 | Case | 59 | Male   | Serum, Urine | Y | N | Y |
| P37 | Case | 54 | Male   | Serum, Urine | Y | Y | Y |
| P38 | Case | 56 | Male   | Serum        | Y | Y | Y |
| P39 | Case | 57 | Male   | Serum        | Y | N | Y |
| P40 | Case | 52 | Male   | Serum        | Y | N | N |
| P41 | Case | 60 | Male   | Serum, Urine | Y | N | Y |
| P42 | Case | 51 | Male   | Serum        | Y | N | Y |
| P43 | Case | 47 | Male   | Serum        | Y | Y | Y |
| P44 | Case | 55 | Female | Serum        | N | N | N |
| P45 | Case | 51 | Male   | Serum        | Y | Y | N |
| P46 | Case | 54 | Female | Serum        | N | N | Y |
| P47 | Case | 48 | Male   | Serum        | N | N | Y |
| P48 | Case | 61 | Female | Serum        | Y | Y | Y |
| P49 | Case | 75 | Female | Serum        | Y | Y | Y |

|     |                 |    |        |            |   |   |   |
|-----|-----------------|----|--------|------------|---|---|---|
| P50 | Case            | 74 | Female | Serum      | Y | N | Y |
| P51 | Case            | 48 | Male   | Serum      | Y | N | Y |
| P52 | Case            | 64 | Female | Serum      | N | N | Y |
| P53 | Case            | 72 | Male   | Serum      | Y | Y | N |
| P54 | Case            | 56 | Male   | Serum      | Y | N | Y |
| P55 | Case            | 69 | Male   | Serum, CSF | Y | Y | N |
| P56 | Case            | 57 | Male   | Serum      | Y | Y | Y |
| P57 | Case            | 52 | Female | Serum      | N | N | Y |
| P58 | Case            | 48 | Male   | Serum      | Y | Y | Y |
| P59 | Case            | 34 | Male   | Serum      | Y | N | N |
| P60 | Case            | 55 | Male   | Serum      | Y | Y | Y |
| P61 | Case            | 37 | Male   | Serum      | Y | N | Y |
| P62 | Case            | 5  | Female | Serum      | Y | Y | N |
| C01 | Control-Health  | 49 | Male   | Serum      | N | N | N |
| C02 | Control-Health  | 20 | Female | Serum      | N | N | N |
| C03 | Control-Health  | 55 | Female | Serum      | N | N | N |
| C04 | Control-Health  | 56 | Male   | Serum      | N | N | N |
| C05 | Control-Health  | 69 | Male   | Serum      | N | N | N |
| C06 | Control-Health  | 59 | Male   | Serum      | N | N | N |
| C07 | Control-Health  | 46 | Male   | Serum      | N | N | N |
| C08 | Control-Health  | 52 | Male   | Serum      | N | N | N |
| C09 | Control-Health  | 37 | Male   | Serum      | N | N | N |
| C10 | Control-Health  | 48 | Female | Serum      | N | N | N |
| C11 | Control-Health  | 60 | Male   | Serum      | N | N | N |
| C12 | Control-Health  | 76 | Male   | Serum      | N | N | N |
| C13 | Control-Health  | 62 | Female | Serum      | N | N | N |
| C14 | Control-Health  | 57 | Male   | Serum      | N | N | N |
| C15 | Control-Health  | 66 | Male   | Serum      | N | N | N |
| C16 | Control-Disease | 51 | Female | Serum      | Y | N | N |
| C17 | Control-Disease | 70 | Male   | Serum      | Y | N | N |
| C18 | Control-Disease | 40 | Male   | Serum      | Y | N | N |
| C19 | Control-Disease | 47 | Female | Serum      | Y | N | N |
| C20 | Control-Disease | 17 | Female | Serum      | Y | N | N |
| C21 | Control-Disease | 39 | Male   | Serum      | Y | N | N |
| C22 | Control-Disease | 56 | Male   | Serum      | Y | N | N |
| C23 | Control-Disease | 46 | Female | Serum      | Y | N | N |
| C24 | Control-Disease | 64 | Male   | Serum      | Y | N | N |
| C25 | Control-Disease | 28 | Female | Serum      | Y | N | N |

Note: Y = Yes, N = No.
